# Supplementary material for: Disruption of the RICTOR/mTORC2 complex enhances the response of head and neck squamous cell carcinoma cells to PI3K inhibition
Source: PubMed Central journal article supplement (PMC6763779; doi:10.1002/1878-0261.12558), 2019-08-28

**A. RICTOR**

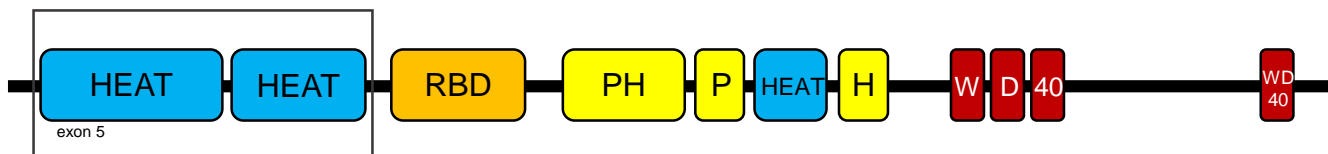

**B. mTOR**

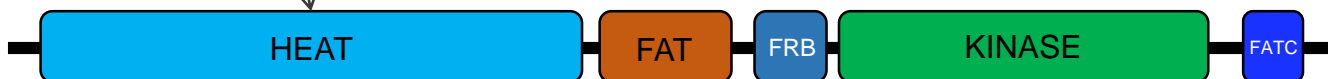

Supplement: MOL2-13-2160-s003.pdf [file MOL2-13-2160-s003.pdf]
