# Supplementary material for: Disruption of the RICTOR/mTORC2 complex enhances the response of head and neck squamous cell carcinoma cells to PI3K inhibition
Source: PubMed Central journal article supplement (PMC6763779; doi:10.1002/1878-0261.12558), 2019-08-28
Supplement: MOL2-13-2160-s005.pdf [file MOL2-13-2160-s005.pdf]

## A. FaDu

```

FaDu 1 ACTTGTATTTTGTGTTGTTTCATACAGTTTGC GGTTAGCTTTATTAATGAAGCAAAGA
E5-3Y 1 ACTTGTATTTTGTGTTGTTTCATACAG-----
E5-3dd 1 ACTTGTATTTTGTGTTGTTTCATACAG-----
E5-2FT 1 ANNNNNNNNNNNNNNNNNNNNNNTTGC GGTTAGCTTTATTAATGAAGCAAAGA
E5-2FB 1 GCT-----

FaDu 61 AGTGCAGCAGCAGGGCTACGAGCGCTTCGATATCTCATCCAAGACTCCAGTATTCTCCA
E5-3Y 28 -----
E5-3dd 28 -----
E5-2FT 61 AGTGCAGCAGCAGGGCTACGAGCGCTTCGATATCTCATCCAAGACTCCAGTATTCTCCA
E5-2FB 4 -----

FaDu 121 GAAGGTGCTAAAATTGAAAGTGGACTATTTAA TAGCTAGGTAAATTCCTAGACTTGTTT
E5-3Y 28 ----- TAGCTAGGTAAATTCCTAGACTTGTTT
E5-3dd 28 ----- TAGCTAGGTAAATTCCTAGACTTGTTT
E5-2FT 121 GAAGGTGCTAAAATTGAAAGTGGNCTATT --TAGCTAGGTAAATTCCTAGACTTGTTT
E5-2FB 4 ----- AGGTAAATTCCTAGACTTGTTT

FaDu 181 ATATATTTTGAATTTTGTGTTGAGTTTTAGCA NNNNNCCATAAAGTGATAGATT
E5-3Y 56 ATATATTTTGAATTTTGTGTTGAGTTTTAGCATGCCTGCCATAAAGTGATAGATT
E5-3dd 56 ATATATTTTGAATTTTGTGTTGAGTTTTAGCATGCCTGCCATAAAGTGATAGATT
E5-2FT 179 ATATATTTTGAATTTTGTGTTGAGTTTTAGCATGCCT NCCATAAAGTGATAGATT
E5-2FB 27 ATATATTTTGAATTTTGTGTTGAGTTTTAGCATGC NCGCCATAAAGTGATAGATT

```

## B. Cal27

```

Cal27 1 NNNNN-----GNTTGC GGTTAGCTTTATTAATGAAGCAAAGAAGT
E5-J14 1 TTCTATTTTGTGTTTTCANACAG-----
E5-H9 1 TAG-----
E5-B3T 1 TTCTATTTTGTGTTTTCATACAGTTGC GGTTAGCTTTATTAATGAAGCAAAGAAGT
E5-B3B 1 NNNNN-----N-----

Cal27 43 GCGAGCAGCAGGGCTACGAGCGCTTCGATATCTCATCCAAGACTCCAGTATTCTCCAGAA
E5-J14 26 -----
E5-H9 4 -----
E5-B3T 61 GCGAGCAGCAGGGCTACGAGCGCTTCGATATCTCATCCAAGACTCCAGTATTCTCCAGAA
E5-B3B 7 -----

Cal27 103 GGTGCTAAAATTGAAAGTGGACTATTTAATA GCTAGGTAAATTCCTAGACTTGTTTATA
E5-J14 26 -----N-----GNTAGGTAAATTCCTAGACTTGTTTATA
E5-H9 4 -----CTAGGTAAATTCCTAGACTTGTTTATA
E5-B3T 121 GGTGCTAAAATT-----GCTAGGTAAATTCCTAGACTTGTTTATA
E5-B3B 7 -----NNNNTTGTTNANA

Cal27 163 TATTTTGAATTTTGTGTTGAGTTTTAGCATGCCTGCCATAAAGTGATAGATTGTA
E5-J14 56 TATTTTGAATTTTGTGTTGAGTTTTAGCATGCCTGCCATAAAGTGATAGATTGTA
E5-H9 32 TATTTTGAATTTTGTGTTGAGTTTTAGCATGCCTGCCATAAAGTGATAGATTGTA
E5-B3T 162 TATTTTGAATTTTGTGTTGAGTTTTAGCATGCCTGCCATAAAGTGATAGATTGTA
E5-B3B 20 TATTTTGA-ATTTTGTGTTGAGTTTTAGCATGCCTGCCATAAAGTGATAGATTGTA

```
