# Supplementary material for: Disruption of the RICTOR/mTORC2 complex enhances the response of head and neck squamous cell carcinoma cells to PI3K inhibition
Source: PubMed Central journal article supplement (PMC6763779; doi:10.1002/1878-0261.12558), 2019-08-28
Supplement: MOL2-13-2160-s007.pdf [file MOL2-13-2160-s007.pdf]

**Supplementary Table 1.** Antibodies used in this study.

| <b>Antibody</b>                    | <b>Company</b> | <b>Catalogue Number</b> | <b>Dilution</b> |
|------------------------------------|----------------|-------------------------|-----------------|
| <b>RICTOR</b>                      | CST            | 9476                    | 1:1000          |
| <b>p110<math>\alpha</math></b>     | CST            | 4249                    | 1:1000          |
| <b><math>\alpha</math>-tubulin</b> | CST            | 2125                    | 1:1000          |
| <b>pAKT (T308)</b>                 | CST            | 4056                    | 1:1000          |
| <b>AKT (pan)</b>                   | CST            | 4685                    | 1:1000          |
| <b>pS6 (S240/4)</b>                | CST            | 5364                    | 1:1000          |
| <b>S6</b>                          | CST            | 2217                    | 1:1000          |
| <b>EGFR</b>                        | CST            | 4267                    | 1:1000          |
| <b>p-mTOR (S2448)</b>              | CST            | 2971                    | 1:1000          |
| <b>mTOR</b>                        | CST            | 2972                    | 1:1000          |
| <b>pAKT (S473)</b>                 | CST            | 4060                    | 1:1000          |
| <b>NDRG1</b>                       | CST            | 9485                    | 1:1000          |
| <b>NDRG1 (T346)</b>                | CST            | 5482                    | 1:1000          |
| <b>PDK1</b>                        | CST            | 13037                   | 1:1000          |
| <b>RICTOR<sup>+</sup></b>          | abcam          | ab70374                 | 1:1000          |

CST, Cell Signaling Technology

<sup>+</sup> for IHC
