# Supplementary material for: Disruption of the RICTOR/mTORC2 complex enhances the response of head and neck squamous cell carcinoma cells to PI3K inhibition
Source: PubMed Central journal article supplement (PMC6763779; doi:10.1002/1878-0261.12558), 2019-08-28
Supplement: MOL2-13-2160-s008.pdf [file MOL2-13-2160-s008.pdf]

**Supplementary Table 2.** Clinical and pathological characteristics of 130 patients with HNSCC and association with RICTOR expression

| Clinicopathological variables | n (%)          | RICTOR                                 |                                                         | p value  |
|-------------------------------|----------------|----------------------------------------|---------------------------------------------------------|----------|
|                               |                | Negative (0) /<br>Weak, incomplete (1) | Moderate, incomplete (2) /<br>strong, near complete (3) |          |
| Age                           | <60            | 69 (53.1)                              | 4                                                       | 0.3461   |
|                               | >=60           | 61 (47.9)                              | 7                                                       |          |
| Gender                        | Male           | 99 (76.2)                              | 8                                                       | 0.723    |
|                               | Female         | 31 (23.8)                              | 3                                                       |          |
| Site                          | Tonsil         | 92 (70.8)                              | 3                                                       | 0.0018 * |
|                               | Base of Tongue | 24 (18.5)                              | 4                                                       |          |
|                               | Other          | 14 (10.8)                              | 4                                                       |          |
| T Classification              | 1              | 31 (23.8)                              | 2                                                       | 0.8377   |
|                               | 2              | 48 (36.9)                              | 4                                                       |          |
|                               | 3              | 28 (21.5)                              | 2                                                       |          |
|                               | 4              | 23 (17.7)                              | 3                                                       |          |
| N Classification              | 0              | 20 (15.4)                              | 1                                                       | 0.7342   |
|                               | 1              | 22 (16.9)                              | 2                                                       |          |
|                               | 2              | 78 (60.0)                              | 7                                                       |          |
|                               | 3              | 10 (7.7)                               | 0                                                       |          |
| Overall Stage                 | 1              | 6 (4.6)                                | 0                                                       | 0.8631   |
|                               | 2              | 9 (7.0)                                | 1                                                       |          |
|                               | 3              | 19 (14.6)                              | 2                                                       |          |
|                               | 4              | 96 (73.8)                              | 8                                                       |          |
| Smoking                       | never smokers  | 28 (21.5)                              | 4                                                       | 0.686    |
|                               | 1-9 py         | 8 (6.2)                                | 1                                                       |          |
|                               | 10-19 py       | 13 (10.0)                              | 1                                                       |          |
|                               | >20 py         | 75 (57.7)                              | 5                                                       |          |
|                               | Unknown        | 6 (4.6)                                | 0                                                       |          |
| Alcohol<br>(drinks/wk)        | < 21 drinks    | 88 (67.7)                              | 7                                                       | 0.7378   |
|                               | >21 drinks     | 38 (29.2)                              | 4                                                       |          |
|                               | Unknown        | 4 (3.0)                                | 0                                                       |          |
| Recurred                      | No             | 104 (80.0)                             | 9                                                       | 0.99     |
|                               | Yes            | 26 (20.0)                              | 2                                                       |          |
| HPV                           | Negative       | 43 (47.8)                              | 1                                                       | 0.618    |
|                               | Positive       | 46 (51.1)                              | 3                                                       |          |

\* Significant features;  $p < 0.05$
